# Supplementary material for: Sources, geochemical characteristics, and control mechanisms of groundwater salinity: a case study of the Ulungur River Basin in northwest China
Source: Royal Society of Chemistry journal article supplement (doi:10.1039/d5em00587f), 2025-10-31
Supplement: d5em00587f1.xlsx [file d5em00587f1.xlsx]

## Sheet: Table notes
	All Chinese words in this table are either transliterations of English or potentially confusing terms; they should be understood according to standard Hanyu Pinyin transliteration. Any untranslated Chinese appearing in the first raw-data table consists solely of names and may be transliterated phonetically.

## Sheet: raw data
								Raw Data
Unit		CN	ENG	Geographic Coordinates				mg/L		mg/L
Serial Number				X	Y	BH		TDS	pH	K+	Na+	Ca2+	Mg2+	Cl-	SO42-	HCO3-	NO3-	F-
MJC06011	R4附近	低山	Low Mountain(LM)	89.7996	46.241	1	Zone1	305.4	7.93	1.48	36.02	58.64	5.28	17.52	128.1	116.6	2.7	0.5
TJ5141				89.3594	46.4766	2	Zone1	494.1	7.32	3.2	113.8	38.5	10.7	35.4	144.1	256.3	3.3	0.9
MJA19641				89.482	46.3902	3	Zone1	581.1	7.2	4.6	69.4	74.1	25.9	28.4	153.7	390.5	7.5	0.5
ZK1514				89.5818	46.3271	4	Zone1	769.3	6.86	2.2	98.7	112.2	29.2	49.6	269	353.9	9.8	1
TJ5411				89.7002	46.2762	5	Zone1	776.85	7.28	5.86	162.9	84.15	19.2	76.39	269.6	317.5	6.4	0.8
MJA16711				89.3781	46.6334	6	Zone1	776.8	7.51	1.86	232.7	34.52	13.05	101.8	224.4	337	5.7	0.8
MJA18511				89.0929	46.4594	7	Zone1	827.3	7.3	5.56	198.8	85.2	33.94	112.8	320.67	161.4	6.9	1.1
MJA18811				89.2379	46.5291	8	Zone1	568	7.46	3.01	160.1	33.32	5.42	47.88	214.6	207.4	7.2	0.7
MJA19911				89.4162	46.4343	9	Zone1	515.3	7.12	2.96	78.2	48	32	30	148.3	350.2	4.9	0.7
ZK06（Lower areas）13				89.2379	46.4563	10	Zone1	512.3	7.43	2.4	70.5	56.1	26.7	46.7	182.5	183.1	3.21	0.6
JJD00211				89.2895	46.4915	11	Zone1	437.5	7.23	7.81	60.1	59.45	12.22	30.96	160.1	197.6	3.87	0.3
MJB00141		河谷	River Valley(RV)	88.1715	46.5541	12	Zone2	939.7	7.24	7.4	118.2	196.3	60.8	131.8	348.8	109.8	8.12	0.5
TJ4241				87.7821	46.6362	13	Zone2	989.6	7.25	11.6	130.9	180.9	99	153.8	365.3	212.6	39.4	0.8
TJ5041				88.7223	46.3628	14	Zone2	953.3	7.07	4.3	96.2	184.2	87.1	126.7	324.8	274.8	5.21	1.5
MJB01241				88.5004	46.5505	15	Zone2	425.4	6.69	11.1	40.7	60.1	21.9	28.4	99.9	244.1	6.54	1.8
MJB03512				88.4114	46.5431	16	Zone2	923.4	7.45	4.9	114.7	132.3	36.4	120.5	336.2	292.9	18.42	0.6
ZK05（Lower areas）	R8附近			88.3282	46.5557	17	Zone2	552.3	7.64	2.8	61.3	32.1	31.6	66.4	150.2	167.5	15.98	0.4
MJD12512				87.9163	46.6073	18	Zone2	959.2	7.42	8.9	141.9	112.2	43.7	120.5	365	268.5	7.34	0.9
ZK1013				87.8786	46.6239	19	Zone2	882.8	7	6.4	73.2	168.3	43.7	35.4	432.3	305.1	14	1.6
ZK1113				88.5041	46.5296	20	Zone2	562.6	7.56	1.9	98	56.1	24.3	49.6	192.1	238	1.43	1
ZK1313				88.4481	46.5254	21	Zone2	570.6	7.52	4	80.8	68.1	29.2	46.1	172.9	292.9	5.3	0.4
ZK0713				88.2437	46.5677	22	Zone2	479.6	7.51	2.7	88.8	48.1	14.6	42.5	144.1	219.7	7.4	1
ZK06（Upper region）13				87.8455	46.5978	23	Zone2	674	7.44	3.1	96.8	60.1	43.7	80.1	259.4	207.5	7.1	0.6
TJ2211				87.9379	46.5568	24	Zone2	926.25	6.97	46.98	174.4	255	31.48	120	356.5	303.5	5.7	1.4
TJ4311				88.1189	46.5555	25	Zone2	1616.2	7.15	4.39	360.6	167.9	16.94	183.7	736.7	291.6	6.3	1.8
MJA17711				88.6626	46.4247	26	Zone2	637.4	7.39	7.2	55.9	81.55	17.03	66.26	217.3	583.2	8.1	0.9
MJA18211				88.8088	46.3563	27	Zone2	869.35	7.29	2.02	98.9	177.4	19.8	34.35	410.5	252.7	9.3	1.1
MJB03211				88.5659	46.4673	28	Zone2	1266.75	7.41	5.75	210.5	169.8	33.02	148.5	534.1	330.5	6.1	1.3
MJA17111				88.5987	46.4453	29	Zone2	541.35	7.44	4.66	56.54	113.6	15.04	42.04	150.6	317.5	11.5	0.6
F3-DR-QSJ-1				88.2959	46.5551	30	Zone2	1056.75	7.52	23.98	128.8	179.3	36.58	129.8	392.9	330.5	12.4	0.8
F3-GA-QSJ-1（杜热以西顶山 to the south）				88.176	46.5743	31	Zone2	488.45	7.5	4.68	89.03	61.6	16.23	57.12	152.9	213.9	11.5	0.9
ZK01	37和41之间	近河	Southern of Alluvial Plain(SAP)	87.6809	46.9779	32	Zone3	660.2	7.5	2.9	82.3	60.1	43.7	53.2	220.9	213.6	33.23	0.5
TJ1841				87.6936	46.8424	33	Zone3	885.1	7.11	5	141.7	88.2	43.7	99.3	307.4	353.9	4.34	0.6
MJA21141				87.5377	47.0959	34	Zone3	1478.7	7.16	5.6	214.8	184.4	58.3	163.1	672.4	244.1	46.4	1.3
MJA00741				87.6309	47.0332	35	Zone3	1381.7	7.03	22.8	252.3	136.3	43.7	198.5	499.5	341.7	39.4	1.2
MJA09041				87.6802	46.8094	36	Zone3	1097.4	7	6.5	155.6	88.2	94.8	156	393.8	317.3	16.8	0.5
JJD00711				87.672	46.874	37	Zone3	995.45	7.38	4.14	139.8	87.92	63.89	132	382.7	286.1	21.1	0.9
JJC00311				87.732	46.689	38	Zone3	1059.25	7.14	5.57	112.9	113.2	65.75	120.8	420	279.5	12.6	0.9
ZK02（Upper region）				87.7045	46.9374	39	Zone3	1087.9	7.15	3.6	134.3	144.3	58.3	85.1	441.9	317.3	39.5	1
TJ2911				87.4101	47.0415	40	Zone3	1120.55	7.1	7.42	156.1	191.7	29.57	151.5	483.6	200.9	37.8	0.9
MJA01911				87.4822	47.0934	41	Zone3	1407.45	7.07	4.47	232	206.1	40.82	175.5	593	311.1	22.1	1.4
MJA00711				87.3739	47.0759	42	Zone3	1522.15	7.11	11.55	284.8	162.3	44.33	222.7	629.6	333.7	13.3	1.2
MJA00311				87.3558	47.1157	43	Zone3	1807.75	6.93	5.31	246.9	270.1	51.65	298.4	751.1	392.1	6.3	1
MJA00411				87.3927	47.1234	44	Zone3	1912	6.92	22.58	337.8	186.6	77.88	250.7	683.2	738.8	5.8	0.9
F3-WLGH-SD（Two Lakes Junction）				87.3313	47.0885	45	Zone3	1725.55	8.14	34.84	465.2	56.35	53.59	325.8	592.8	392.9	3.4	1.8
MJA22441		远河	Nouthern of Alluvial Plain(NAP)	87.5742	47.1286	46	Zone4	2050.4	7.2	8.8	244.4	260.5	94.8	124.1	1095.1	341.7	31.9	1
TJ1241				87.873	46.9313	47	Zone4	3315.9	7.23	6.9	368.1	601.2	24.3	170.2	1969.2	292.9	3.5	1.8
TJ2141				87.9323	46.8116	48	Zone4	1974.3	7.2	6.2	420.1	84.2	133.6	460.8	489.9	695.6	5	1
MJA06041				87.7073	47.0118	49	Zone4	1960.9	7.08	19	371.1	208.4	55.9	354.5	720.4	292.9	64.8	1
MJC10241				87.4161	47.0936	50	Zone4	1496.2	7.22	8.8	253.3	120.2	82.6	177.2	662.8	341.7	1.2	1
ZK08（Upper region）				88.0238	46.6992	51	Zone4	3212.5	7.6	2.2	828.5	72.1	177.4	907.5	1066.3	238	16.2	0.7
ZK05（Upper region）				87.4973	47.129	52	Zone4	974.7	7.49	4.5	187.9	64.1	53.5	124.1	365	305.1	1.9	1
TJ0611				87.6018	47.1734	53	Zone4	3098.45	6.88	8.41	388	540.5	61.98	190.6	1753	311.1	28.3	2.1
TJ1011				87.6812	47.112	54	Zone4	4156.65	7.21	16.41	553.9	609.9	131.7	277.8	2313	508.7	36.9	2.6
MJA16211	52下边53下边			87.7171	47.0653	55	Zone4	3273.7	7.14	1.09	628.6	328	115	799.4	1343	116.6	6.2	2.1
TJ1111				87.7966	47.0772	56	Zone4	5621.8	7.22	11.84	1153	534.6	117	589	3038	356.4	26.3	2.3
TJ1511				87.7862	46.7518	57	Zone4	2201.55	7.41	4.93	651.2	81.13	31.62	422.4	909.5	200.9	21.3	1.4
TJ1611				87.8941	46.7506	58	Zone4	565.85	7.31	2.33	89.43	89.54	11.63	56.49	193.3	246.3	13.4	1.3
ZK1213	55，59前面			87.8465	46.7855	59	Zone4	638.7	7.84	1.9	78.3	82.1	29.9	33.2	286.2	229.2	14.34	1.4
MJD08511				87.8725	46.8397	60	Zone4	1490.25	7.4	3.61	301.9	149.6	28.07	142.7	692.6	343.5	5.2	1.4
MJA15811	56上边一些			87.9516	46.8955	61	Zone4	2653.5	7.1	7.88	579.9	295.5	30.85	710.4	941.4	175	12.8	1.6
MJA14741	53与57上边			87.8679	47.0684	62	Zone4	5413.4	7.13	2.2	639.7	801.7	243	443.1	3073.9	390.5	1.7	2.2
MJD01811				87.8129	47.0237	63	Zone4	1809.45	7.24	34.25	121.6	396.6	45.01	114.5	942.5	311.1	19.2	1.7
MJD03011				87.7826	46.8416	64	Zone4	1680.35	7.23	3.06	198.2	332.1	19.39	86.32	823.2	395.3	17.3	1.6
公安（qsi-4）ga-2				87.8424	46.7345	65	Zone4	681.55	7.38	4.73	78.1	151.5	20.71	71.13	222.6	265.7	16.8	1.4
YH1				87.6279	47.2078	66	Zone4	4228	7.12	15.1	909.8	364.1	128.8	1028	1527.4	356.3	27.9	2.3
YH2				87.6917	47.1709	67	Zone4	3815.8	7.23	11.3	1096.9	376.2	182.6	886.2	1085.5	319.7	33.5	2.5
YH3				87.7509	47.1354	68	Zone4	3488.15	7.22	9.08	628.3	252.2	79.37	980.1	1273	371.7	30.4	2.2
MJA18341	56 46 58 与45之间			87.7824	46.9824	69	Zone4	2117.6	7.3	4.9	531.4	44.1	97.2	354.5	874.1	268.5	15.3	1.2
QSA00641				87.8603	46.8856	70	Zone4	1954.2	7.4	14.2	491.3	160.3	24.3	460.8	576.4	414.9	3.7	1.5
MJA13711				87.797	46.9112	71	Zone4	1989.15	7.12	1.29	431.2	193.6	39.37	321.7	869.5	265.7	8.1	1.1
MJA15941	41和45之间			87.8295	46.9564	72	Zone4	1821.5	7.67	3.6	430.9	100.2	60.8	354.5	634	390.5	17.9	2.5
TJ3441				87.538	47.1955	73	Zone4	4320.2	7.08	12.3	627.8	561.1	121.5	312	2401.5	506.5	10.5	2.9
ZK03				87.6393	47.1422	74	Zone4	4017	7.82	7	1109.8	64.1	128.8	1028	1527.4	256.3	68.8	0.9
MJA00211				87.492	47.1563	75	Zone4	2319.6	6.92	19.73	346.1	296.7	69.22	356.1	1021	453.6	7.1	1.5
MJA00511				87.3587	47.1588	76	Zone4	4988.65	6.94	8.43	828.2	573.4	169.8	917.5	2148	764.7	4.2	1.9
MJA00611				87.3989	47.1938	77	Zone4	4988.65	7.05	25.93	376.1	200.9	51.58	256.5	967.4	511.9	5.7	2.1
TJ0711				87.4564	47.2251	78	Zone4	7511.25	7.16	25.66	1716	560.4	157.6	1083	3729	479.5	7.6	1.9
TJ0911				87.5818	47.2386	79	Zone4	8553.31	6.82	40.76	2866	624.1	163.6	1078	3598	365.7	8.3	2.1
F3-SLA-WLGH-1		地表水	UL	87.105	47.1622			2249.2	8.12	49.08	627	44.54	69.18	433.5	777.1	411.6
F3-SLA-WLGH-2				87.2281	47.0564			2202.2	8.46	48.52	616	47.2	70.18	425.1	763.8	439.7
F3-SLA-WLGH-3				87.3944	47.2368			2197.3	8.6	48.09	623	41.65	68.72	426.9	766.5	383.5
F3-SLA-WLGH-4				87.4772	47.3997			2194.3	8.51	47.69	607	49.31	68.5	424.3	770.3	405.4
F3-SLA-WLGH-5				87.3172	47.032			2155.4	8.38	56.7	636	32.1	82.6	407.2	691.6	390.5
F3-SLA-WLGH-6				87.2513	47.0207			2051.5	8.22	44.58	572	52.94	65.66	389.2	703.1	447.1
F3-SLA-JLH-1			JL	87.3868	46.9544			1254.3	7.6	23.23	321	60.6	38.96	225.2	431.5	277.5
F3-SLA-JLH-2				87.3623	46.8539			976.4	7.58	17.17	251	80.1	32.24	155.7	309.8	243.2
F3-SLA-JLH-3				87.4744	46.8705			989.5	7.59	17.04	245	53.15	31.11	173.8	347.5	237
F3-SLA-JLH-4				87.4811	46.9819			1024.4	8.17	17.46	247	64.25	31.12	173.7	340.2	259.2
F3-SLA-JLH-5				87.363	46.9242			1154	7.45	21.5	253	48.1	37.5	202.1	457.1	256.3
F3-SLA-JLH-6				87.3648	46.9828			1216.8	7.7	20.2	300	51.4	36.16	219.3	460.7	288.4
R1			R	90.4797	46.1256			37.9	7.99	1.13	2	6.77	0.99	2.6	11.1	25.9			1
R2				90.3048	45.9824			178.1	7.03	2.2	15	40.1	5.1	8.3	49.2	113.7			2
R3				90.0975	46.0625			240.9	7.5	2.63	25	43.06	7.63	12.7	85.4	129.6			3
R4				89.8498	46.2339			206.2	7.61	7.14	24	40.44	7.14	10.5	83	77.8			4
R5				89.6206	46.3019			484.3	7.45	5.7	60	100.6	17.51	30.1	193	155.5			5
R6				89.1494	46.4299			311.7	7.45	2.94	35	55.6	9.78	18.3	106.1	168.5			6
R7				88.5494	46.5131			302.1	7.76	4.06	38	49.7	9.32	26.4	99.6	149			7
R8				88.3657	46.5492			377.3	7.68	2.8	56	59.16	10.65	36.3	131.8	162			8
R9				88.0788	46.5755			405.8	7.68	3.17	57	69.94	11.52	40.9	135.6	175			9
R10				87.8314	46.6591			532.2	7.82	3.41	80	78.95	16.96	48.4	207.1	194.4			10
R11				87.6817	46.9103			600.1	8.06	4.24	114	94.86	21.6	55.3	197.8	213.9			11
R12				87.5954	47.0687			683.8	8.11	5.76	154	92.28	24.94	63.2	236.6	199.7			12

## Sheet: Determination method
								Raw Data												Sample Collection Requirements												All samples were filtered on-site through a 0.45 µm membrane, then sealed and stored in low-temperature (4 °C) containers.
Unit		CN	ENG	Geographic Coordinates				mg/L		mg/L
Serial Number				X	Y	BH		TDS	pH	K+	Na+	Ca2+	Mg2+	Cl-	SO42-	HCO3-	NO3-	F-
MJC06011	R4附近	低山	Low Mountain(LM)	89.7996	46.241	1	Zone1	305.4	7.93	1.48	36.02	58.64	5.28	17.52	128.1	116.6	2.7	0.5		Groundwater samples were collected from domestic wells (confined aquifer) in 150 mL polyethylene bottles; each bottle was rinsed at least three times with the water to be sampled before filling.
TJ5141				89.3594	46.4766	2	Zone1	494.1	7.32	3.2	113.8	38.5	10.7	35.4	144.1	256.3	3.3	0.9
MJA19641				89.482	46.3902	3	Zone1	581.1	7.2	4.6	69.4	74.1	25.9	28.4	153.7	390.5	7.5	0.5
ZK1514				89.5818	46.3271	4	Zone1	769.3	6.86	2.2	98.7	112.2	29.2	49.6	269	353.9	9.8	1
TJ5411				89.7002	46.2762	5	Zone1	776.85	7.28	5.86	162.9	84.15	19.2	76.39	269.6	317.5	6.4	0.8
MJA16711				89.3781	46.6334	6	Zone1	776.8	7.51	1.86	232.7	34.52	13.05	101.8	224.4	337	5.7	0.8
MJA18511				89.0929	46.4594	7	Zone1	827.3	7.3	5.56	198.8	85.2	33.94	112.8	320.67	161.4	6.9	1.1
MJA18811				89.2379	46.5291	8	Zone1	568	7.46	3.01	160.1	33.32	5.42	47.88	214.6	207.4	7.2	0.7
MJA19911				89.4162	46.4343	9	Zone1	515.3	7.12	2.96	78.2	48	32	30	148.3	350.2	4.9	0.7
ZK06（下层）13				89.2379	46.4563	10	Zone1	512.3	7.43	2.4	70.5	56.1	26.7	46.7	182.5	183.1	3.21	0.6
JJD00211				89.2895	46.4915	11	Zone1	437.5	7.23	7.81	60.1	59.45	12.22	30.96	160.1	197.6	3.87	0.3
MJB00141		河谷	River Valley(RV)	88.1715	46.5541	12	Zone2	939.7	7.24	7.4	118.2	196.3	60.8	131.8	348.8	109.8	8.12	0.5
TJ4241				87.7821	46.6362	13	Zone2	989.6	7.25	11.6	130.9	180.9	99	153.8	365.3	212.6	39.4	0.8
TJ5041				88.7223	46.3628	14	Zone2	953.3	7.07	4.3	96.2	184.2	87.1	126.7	324.8	274.8	5.21	1.5
MJB01241				88.5004	46.5505	15	Zone2	425.4	6.69	11.1	40.7	60.1	21.9	28.4	99.9	244.1	6.54	1.8
MJB03512				88.4114	46.5431	16	Zone2	923.4	7.45	4.9	114.7	132.3	36.4	120.5	336.2	292.9	18.42	0.6
ZK05（下层）	R8附近			88.3282	46.5557	17	Zone2	552.3	7.64	2.8	61.3	32.1	31.6	66.4	150.2	167.5	15.98	0.4
MJD12512				87.9163	46.6073	18	Zone2	959.2	7.42	8.9	141.9	112.2	43.7	120.5	365	268.5	7.34	0.9
ZK1013				87.8786	46.6239	19	Zone2	882.8	7	6.4	73.2	168.3	43.7	35.4	432.3	305.1	14	1.6
ZK1113				88.5041	46.5296	20	Zone2	562.6	7.56	1.9	98	56.1	24.3	49.6	192.1	238	1.43	1
ZK1313				88.4481	46.5254	21	Zone2	570.6	7.52	4	80.8	68.1	29.2	46.1	172.9	292.9	5.3	0.4
ZK0713				88.2437	46.5677	22	Zone2	479.6	7.51	2.7	88.8	48.1	14.6	42.5	144.1	219.7	7.4	1
ZK06（上层）13				87.8455	46.5978	23	Zone2	674	7.44	3.1	96.8	60.1	43.7	80.1	259.4	207.5	7.1	0.6
TJ2211				87.9379	46.5568	24	Zone2	926.25	6.97	46.98	174.4	255	31.48	120	356.5	303.5	5.7	1.4
TJ4311				88.1189	46.5555	25	Zone2	1616.2	7.15	4.39	360.6	167.9	16.94	183.7	736.7	291.6	6.3	1.8
MJA17711				88.6626	46.4247	26	Zone2	637.4	7.39	7.2	55.9	81.55	17.03	66.26	217.3	583.2	8.1	0.9
MJA18211				88.8088	46.3563	27	Zone2	869.35	7.29	2.02	98.9	177.4	19.8	34.35	410.5	252.7	9.3	1.1
MJB03211				88.5659	46.4673	28	Zone2	1266.75	7.41	5.75	210.5	169.8	33.02	148.5	534.1	330.5	6.1	1.3
MJA17111				88.5987	46.4453	29	Zone2	541.35	7.44	4.66	56.54	113.6	15.04	42.04	150.6	317.5	11.5	0.6
F3-DR-QSJ-1				88.2959	46.5551	30	Zone2	1056.75	7.52	23.98	128.8	179.3	36.58	129.8	392.9	330.5	12.4	0.8
F3-GA-QSJ-1（杜热以西顶山以南）				88.176	46.5743	31	Zone2	488.45	7.5	4.68	89.03	61.6	16.23	57.12	152.9	213.9	11.5	0.9
ZK01	37和41之间	近河	Southern of Alluvial Plain(SAP)	87.6809	46.9779	32	Zone3	660.2	7.5	2.9	82.3	60.1	43.7	53.2	220.9	213.6	33.23	0.5
TJ1841				87.6936	46.8424	33	Zone3	885.1	7.11	5	141.7	88.2	43.7	99.3	307.4	353.9	4.34	0.6
MJA21141				87.5377	47.0959	34	Zone3	1478.7	7.16	5.6	214.8	184.4	58.3	163.1	672.4	244.1	46.4	1.3
MJA00741				87.6309	47.0332	35	Zone3	1381.7	7.03	22.8	252.3	136.3	43.7	198.5	499.5	341.7	39.4	1.2
MJA09041				87.6802	46.8094	36	Zone3	1097.4	7	6.5	155.6	88.2	94.8	156	393.8	317.3	16.8	0.5
JJD00711				87.672	46.874	37	Zone3	995.45	7.38	4.14	139.8	87.92	63.89	132	382.7	286.1	21.1	0.9
JJC00311				87.732	46.689	38	Zone3	1059.25	7.14	5.57	112.9	113.2	65.75	120.8	420	279.5	12.6	0.9
ZK02（上层）				87.7045	46.9374	39	Zone3	1087.9	7.15	3.6	134.3	144.3	58.3	85.1	441.9	317.3	39.5	1
TJ2911				87.4101	47.0415	40	Zone3	1120.55	7.1	7.42	156.1	191.7	29.57	151.5	483.6	200.9	37.8	0.9
MJA01911				87.4822	47.0934	41	Zone3	1407.45	7.07	4.47	232	206.1	40.82	175.5	593	311.1	22.1	1.4
MJA00711				87.3739	47.0759	42	Zone3	1522.15	7.11	11.55	284.8	162.3	44.33	222.7	629.6	333.7	13.3	1.2
MJA00311				87.3558	47.1157	43	Zone3	1807.75	6.93	5.31	246.9	270.1	51.65	298.4	751.1	392.1	6.3	1
MJA00411				87.3927	47.1234	44	Zone3	1912	6.92	22.58	337.8	186.6	77.88	250.7	683.2	738.8	5.8	0.9
F3-WLGH-SD（两湖连接）				87.3313	47.0885	45	Zone3	1725.55	8.14	34.84	465.2	56.35	53.59	325.8	592.8	392.9	3.4	1.8
MJA22441		远河	Nouthern of Alluvial Plain(NAP)	87.5742	47.1286	46	Zone4	2050.4	7.2	8.8	244.4	260.5	94.8	124.1	1095.1	341.7	31.9	1
TJ1241				87.873	46.9313	47	Zone4	3315.9	7.23	6.9	368.1	601.2	24.3	170.2	1969.2	292.9	3.5	1.8
TJ2141				87.9323	46.8116	48	Zone4	1974.3	7.2	6.2	420.1	84.2	133.6	460.8	489.9	695.6	5	1
MJA06041				87.7073	47.0118	49	Zone4	1960.9	7.08	19	371.1	208.4	55.9	354.5	720.4	292.9	64.8	1
MJC10241				87.4161	47.0936	50	Zone4	1496.2	7.22	8.8	253.3	120.2	82.6	177.2	662.8	341.7	1.2	1
ZK08（上层）				88.0238	46.6992	51	Zone4	3212.5	7.6	2.2	828.5	72.1	177.4	907.5	1066.3	238	16.2	0.7
ZK05（上层）				87.4973	47.129	52	Zone4	974.7	7.49	4.5	187.9	64.1	53.5	124.1	365	305.1	1.9	1
TJ0611				87.6018	47.1734	53	Zone4	3098.45	6.88	8.41	388	540.5	61.98	190.6	1753	311.1	28.3	2.1
TJ1011				87.6812	47.112	54	Zone4	4156.65	7.21	16.41	553.9	609.9	131.7	277.8	2313	508.7	36.9	2.6
MJA16211	52下边53下边			87.7171	47.0653	55	Zone4	3273.7	7.14	1.09	628.6	328	115	799.4	1343	116.6	6.2	2.1
TJ1111				87.7966	47.0772	56	Zone4	5621.8	7.22	11.84	1153	534.6	117	589	3038	356.4	26.3	2.3
TJ1511				87.7862	46.7518	57	Zone4	2201.55	7.41	4.93	651.2	81.13	31.62	422.4	909.5	200.9	21.3	1.4
TJ1611				87.8941	46.7506	58	Zone4	565.85	7.31	2.33	89.43	89.54	11.63	56.49	193.3	246.3	13.4	1.3
ZK1213	55，59前面			87.8465	46.7855	59	Zone4	638.7	7.84	1.9	78.3	82.1	29.9	33.2	286.2	229.2	14.34	1.4
MJD08511				87.8725	46.8397	60	Zone4	1490.25	7.4	3.61	301.9	149.6	28.07	142.7	692.6	343.5	5.2	1.4
MJA15811	56上边一些			87.9516	46.8955	61	Zone4	2653.5	7.1	7.88	579.9	295.5	30.85	710.4	941.4	175	12.8	1.6
MJA14741	53与57上边			87.8679	47.0684	62	Zone4	5413.4	7.13	2.2	639.7	801.7	243	443.1	3073.9	390.5	1.7	2.2
MJD01811				87.8129	47.0237	63	Zone4	1809.45	7.24	34.25	121.6	396.6	45.01	114.5	942.5	311.1	19.2	1.7
MJD03011				87.7826	46.8416	64	Zone4	1680.35	7.23	3.06	198.2	332.1	19.39	86.32	823.2	395.3	17.3	1.6
公安（qsi-4）ga-2				87.8424	46.7345	65	Zone4	681.55	7.38	4.73	78.1	151.5	20.71	71.13	222.6	265.7	16.8	1.4
YH1				87.6279	47.2078	66	Zone4	4228	7.12	15.1	909.8	364.1	128.8	1028	1527.4	356.3	27.9	2.3
YH2				87.6917	47.1709	67	Zone4	3815.8	7.23	11.3	1096.9	376.2	182.6	886.2	1085.5	319.7	33.5	2.5
YH3				87.7509	47.1354	68	Zone4	3488.15	7.22	9.08	628.3	252.2	79.37	980.1	1273	371.7	30.4	2.2
MJA18341	56 46 58 与45之间			87.7824	46.9824	69	Zone4	2117.6	7.3	4.9	531.4	44.1	97.2	354.5	874.1	268.5	15.3	1.2
QSA00641				87.8603	46.8856	70	Zone4	1954.2	7.4	14.2	491.3	160.3	24.3	460.8	576.4	414.9	3.7	1.5
MJA13711				87.797	46.9112	71	Zone4	1989.15	7.12	1.29	431.2	193.6	39.37	321.7	869.5	265.7	8.1	1.1
MJA15941	41和45之间			87.8295	46.9564	72	Zone4	1821.5	7.67	3.6	430.9	100.2	60.8	354.5	634	390.5	17.9	2.5
TJ3441				87.538	47.1955	73	Zone4	4320.2	7.08	12.3	627.8	561.1	121.5	312	2401.5	506.5	10.5	2.9
ZK03				87.6393	47.1422	74	Zone4	4017	7.82	7	1109.8	64.1	128.8	1028	1527.4	256.3	68.8	0.9
MJA00211				87.492	47.1563	75	Zone4	2319.6	6.92	19.73	346.1	296.7	69.22	356.1	1021	453.6	7.1	1.5
MJA00511				87.3587	47.1588	76	Zone4	4988.65	6.94	8.43	828.2	573.4	169.8	917.5	2148	764.7	4.2	1.9
MJA00611				87.3989	47.1938	77	Zone4	4988.65	7.05	25.93	376.1	200.9	51.58	256.5	967.4	511.9	5.7	2.1
TJ0711				87.4564	47.2251	78	Zone4	7511.25	7.16	25.66	1716	560.4	157.6	1083	3729	479.5	7.6	1.9
TJ0911				87.5818	47.2386	79	Zone4	8553.31	6.82	40.76	2866	624.1	163.6	1078	3598	365.7	8.3	2.1
F3-SLA-WLGH-1		地表水 Surface water	UL	87.105	47.1622	80		2249.2	8.12	49.08	627	44.54	69.18	433.5	777.1	411.6				The sampler was placed 50 cm below the water table to ensure adequate sampling.
F3-SLA-WLGH-2				87.2281	47.0564	81		2202.2	8.46	48.52	616	47.2	70.18	425.1	763.8	439.7
F3-SLA-WLGH-3				87.3944	47.2368	82		2197.3	8.6	48.09	623	41.65	68.72	426.9	766.5	383.5
F3-SLA-WLGH-4				87.4772	47.3997	83		2194.3	8.51	47.69	607	49.31	68.5	424.3	770.3	405.4
F3-SLA-WLGH-5				87.3172	47.032	84		2155.4	8.38	56.7	636	32.1	82.6	407.2	691.6	390.5
F3-SLA-WLGH-6				87.2513	47.0207	85		2051.5	8.22	44.58	572	52.94	65.66	389.2	703.1	447.1
F3-SLA-JLH-1			JL	87.3868	46.9544	86		1254.3	7.6	23.23	321	60.6	38.96	225.2	431.5	277.5
F3-SLA-JLH-2				87.3623	46.8539	87		976.4	7.58	17.17	251	80.1	32.24	155.7	309.8	243.2
F3-SLA-JLH-3				87.4744	46.8705	88		989.5	7.59	17.04	245	53.15	31.11	173.8	347.5	237
F3-SLA-JLH-4				87.4811	46.9819	89		1024.4	8.17	17.46	247	64.25	31.12	173.7	340.2	259.2
F3-SLA-JLH-5				87.363	46.9242	90		1154	7.45	21.5	253	48.1	37.5	202.1	457.1	256.3
F3-SLA-JLH-6				87.3648	46.9828	91		1216.8	7.7	20.2	300	51.4	36.16	219.3	460.7	288.4
R1			R	90.4797	46.1256	92		37.9	7.99	1.13	2	6.77	0.99	2.6	11.1	25.9			1
R2				90.3048	45.9824	93		178.1	7.03	2.2	15	40.1	5.1	8.3	49.2	113.7			2
R3				90.0975	46.0625	94		240.9	7.5	2.63	25	43.06	7.63	12.7	85.4	129.6			3
R4				89.8498	46.2339	95		206.2	7.61	7.14	24	40.44	7.14	10.5	83	77.8			4
R5				89.6206	46.3019	96		484.3	7.45	5.7	60	100.6	17.51	30.1	193	155.5			5
R6				89.1494	46.4299	97		311.7	7.45	2.94	35	55.6	9.78	18.3	106.1	168.5			6
R7				88.5494	46.5131	98		302.1	7.76	4.06	38	49.7	9.32	26.4	99.6	149			7
R8				88.3657	46.5492	99		377.3	7.68	2.8	56	59.16	10.65	36.3	131.8	162			8
R9				88.0788	46.5755	100		405.8	7.68	3.17	57	69.94	11.52	40.9	135.6	175			9
R10				87.8314	46.6591	101		532.2	7.82	3.41	80	78.95	16.96	48.4	207.1	194.4			10
R11				87.6817	46.9103	102		600.1	8.06	4.24	114	94.86	21.6	55.3	197.8	213.9			11
R12				87.5954	47.0687	103		683.8	8.11	5.76	154	92.28	24.94	63.2	236.6	199.7			12
		Analytical method						On-site measurements were carried out with a portable multi-parameter probe (Hach HQ40d).		Quantification was performed by inductively coupled plasma atomic emission spectrometry (ICAP-6300).				Determination was carried out by ion chromatography (ICS-1100).		Determination was performed by titration with 0.05 mol/L hydrochloric acid (HCl) and 0.05 mol/L sodium hydroxide (NaOH).	UV spectrophotometry

## Sheet: partial pressure of CO₂ (pCO₂)
PCO2	F-	logPCO2	KCO2	K1	T=25°
			10^-1.47	10^-6.35
0.00148378	0.5	-2.82863
0.0132868	0.9	-1.87658
0.0266865	0.5	-1.57371
0.0529116	1	-1.27645
0.0180474	0.8	-1.74359
0.0112798	0.8	-1.9477
0.0087614	1.1	-2.05743
0.00778895	0.7	-2.10852
0.0287731	0.7	-1.54101
0.00736815	0.6	-2.13264
0.0126025	0.3	-1.89954
0.00684341	0.5	-2.16473
0.0129489	0.8	-1.88777
0.025333	1.5	-1.59631
0.0539806	1.8	-1.26776
0.0112561	0.6	-1.94861
0.00415609	0.4	-2.38132
0.0110564	0.9	-1.95639
0.0330455	1.6	-1.48089
0.00709982	1	-2.14875
0.00958053	0.4	-2.01861
0.0073536	1	-2.1335
0.00815996	0.6	-2.08831
0.0352232	1.4	-1.45317
0.0223593	1.8	-1.65054
0.0257328	0.9	-1.58951
0.014037	1.1	-1.85272
0.0139265	1.3	-1.85616
0.0124857	0.6	-1.90359
0.0108104	0.8	-1.96616
0.00732624	0.9	-2.13512
0.00731596	0.5	-2.13573
0.0297544	0.6	-1.52645
0.018291	1.3	-1.73776
0.0345394	1.2	-1.46168
0.0343669	0.5	-1.46386
0.0129178	0.9	-1.88881
0.0219307	0.9	-1.65895
0.0243299	1	-1.61386
0.0172842	0.9	-1.76235
0.0286794	1.4	-1.54243
0.028056	1.2	-1.55197
0.0498961	1	-1.30193
0.0962049	0.9	-1.0168
0.00308285	1.8	-2.51105
0.0233515	1	-1.63168
0.0186805	1.8	-1.72861
0.0475368	1	-1.32297
0.026387	1	-1.57861
0.0223005	1	-1.65168
0.00647511	0.7	-2.18875
0.0106933	1	-1.97089
0.0444191	2.1	-1.35243
0.0339728	2.6	-1.46887
0.0091489	2.1	-2.03863
0.0232599	2.3	-1.63339
0.00846545	1.4	-2.07235
0.0130658	1.3	-1.88387
0.00358827	1.4	-2.44512
0.0148114	1.4	-1.8294
0.015056	1.6	-1.82229
0.0313539	2.2	-1.50371
0.0193897	1.7	-1.71243
0.0252114	1.6	-1.5984
0.0119967	1.4	-1.92094
0.0292743	2.3	-1.53351
0.0203898	2.5	-1.69059
0.0242584	2.2	-1.61514
0.0145752	1.2	-1.83639
0.0178901	1.5	-1.74739
0.0218304	1.1	-1.66094
0.00904256	2.5	-2.04371
0.0456299	2.9	-1.34075
0.00420164	0.9	-2.37658
0.0590668	1.5	-1.22866
0.0950958	1.9	-1.02184
0.0494146	2.1	-1.30614
0.0359301	1.9	-1.44454
0.0599508	2.1	-1.2222
0.00338178		-2.47085
0.0016513		-2.78217
0.00104336		-2.98156
0.00135692		-2.86745
0.00176316		-2.75371
0.00291793		-2.53493
0.00754976		-2.12207
0.00692841		-2.15937
0.00659809		-2.18058
0.00189804		-2.72169
0.0098496		-2.00658
0.00623254		-2.20533
0.000287058		-3.54203
0.0114929		-1.93957
0.0044389		-2.35272
0.00206847		-2.68435
0.00597586		-2.2236
0.00647545		-2.18873
0.00280451		-2.55214
0.00366594		-2.43581
0.00396012		-2.40229
0.00318689		-2.49663
0.00201781		-2.69512
0.00167899		-2.77495
0.00167549		-2.77586

## Sheet: saturation index（SI）
				Geographic Coordinates			raw data
Unit		CN	ENG				mg/L		mg/L
Serial Number				X	Y	BH	TDS	pH	K+	Na+	Ca2+	Mg2+	Cl-	SO42-	HCO3-	NO3-	F-	si_Dolomite	si_Calcite	si_Fluorite	si_Gypsum	si_Mirabilite	si_Halite		si_Mirabilite	si_Fluorite		si_Halite	si_Fluorite		F-	si_Fluorite		si_Calcite	si_Fluorite		si_Dolomite	si_Fluorite		si_Gypsum	si_Fluorite		TDS	F-		TDS	si_Fluorite		TDS
																										Y			Y		X	Y		X	Y		X	Y		X	Y
MJC06011	R4附近	低山	Low Mountain(LM)	89.7996	46.241	1	305.4	7.93	1.48	36.02	58.64	5.28	17.52	128.1	116.6	2.7	0.5	-0.1694	0.2775	-1.6267	-1.5401	-7.3927	-7.7479		-7.3927	-1.6267		-7.7479	-1.6267		0.5	-1.6267		0.2775	-1.6267		-0.1694	-1.6267		-1.5401	-1.6267		305.4	0.5		305.4	-1.6267		305.4
TJ5141				89.3594	46.4766	2	494.1	7.32	3.2	113.8	38.5	10.7	35.4	144.1	256.3	3.3	0.9	-0.6428	-0.2038	-1.3515	-1.7207	-6.3821	-6.9577		-6.3821	-1.3515		-6.9577	-1.3515		0.9	-1.3515		-0.2038	-1.3515		-0.6428	-1.3515		-1.7207	-1.3515		494.1	0.9		494.1	-1.3515		494.1
MJA19641				89.482	46.3902	3	581.1	7.2	4.6	69.4	74.1	25.9	28.4	153.7	390.5	7.5	0.5	0.0917	0.1128	-1.6267	-1.4811	-6.8462	-7.2799		-6.8462	-1.6267		-7.2799	-1.6267		0.5	-1.6267		0.1128	-1.6267		0.0917	-1.6267		-1.4811	-1.6267		581.1	0.5		581.1	-1.6267		581.1
ZK1514				89.5818	46.3271	4	769.3	6.86	2.2	98.7	112.2	29.2	49.6	269	353.9	9.8	1	-0.5311	-0.1328	-0.8945	-1.13	-6.3473	-6.8984		-6.3473	-0.8945		-6.8984	-0.8945		1	-0.8945		-0.1328	-0.8945		-0.5311	-0.8945		-1.13	-0.8945		769.3	1		769.3	-0.8945		769.3
TJ5411				89.7002	46.2762	5	776.85	7.28	5.86	162.9	84.15	19.2	76.39	269.6	317.5	6.4	0.8	-0.0903	0.1162	-1.2031	-1.2336	-5.891	-6.4921		-5.891	-1.2031		-6.4921	-1.2031		0.8	-1.2031		0.1162	-1.2031		-0.0903	-1.2031		-1.2336	-1.2031		776.85	0.8		776.85	-1.2031		776.85
MJA16711				89.3781	46.6334	6	776.8	7.51	1.86	232.7	34.52	13.05	101.8	224.4	337	5.7	0.8	-0.1086	-0.0032	-1.5743	-1.6611	-5.6299	-6.2092		-5.6299	-1.5743		-6.2092	-1.5743		0.8	-1.5743		-0.0032	-1.5743		-0.1086	-1.5743		-1.6611	-1.5743		776.8	0.8		776.8	-1.5743		776.8
MJA18511				89.0929	46.4594	7	827.3	7.3	5.56	198.8	85.2	33.94	112.8	320.67	161.4	6.9	1.1	-0.4042	-0.161	-0.9456	-1.1789	-5.6685	-6.2396		-5.6685	-0.9456		-6.2396	-0.9456		1.1	-0.9456		-0.161	-0.9456		-0.4042	-0.9456		-1.1789	-0.9456		827.3	1.1		827.3	-0.9456		827.3
MJA18811				89.2379	46.5291	8	568	7.46	3.01	160.1	33.32	5.42	47.88	214.6	207.4	7.2	0.7	-0.961	-0.2452	-1.6567	-1.6357	-5.9217	-6.6848		-5.9217	-1.6567		-6.6848	-1.6567		0.7	-1.6567		-0.2452	-1.6567		-0.961	-1.6567		-1.6357	-1.6567		568	0.7		568	-1.6567		568
MJA19911				89.4162	46.4343	9	515.3	7.12	2.96	78.2	48	32	30	148.3	350.2	4.9	0.7	-0.2377	-0.1918	-1.5188	-1.6652	-6.7451	-7.2003		-6.7451	-1.5188		-7.2003	-1.5188		0.7	-1.5188		-0.1918	-1.5188		-0.2377	-1.5188		-1.6652	-1.5188		515.3	0.7		515.3	-1.5188		515.3
ZK06（下层）13				89.2379	46.4563	10	512.3	7.43	2.4	70.5	56.1	26.7	46.7	182.5	183.1	3.21	0.6	-0.1804	-0.0889	-1.5687	-1.4937	-6.7299	-7.0483		-6.7299	-1.5687		-7.0483	-1.5687		0.6	-1.5687		-0.0889	-1.5687		-0.1804	-1.5687		-1.4937	-1.5687		512.3	0.6		512.3	-1.5687		512.3
JJD00211				89.2895	46.4915	11	437.5	7.23	7.81	60.1	59.45	12.22	30.96	160.1	197.6	3.87	0.3	-0.7959	-0.2145	-2.1122	-1.4919	-6.8948	-7.2909		-6.8948	-2.1122		-7.2909	-2.1122		0.3	-2.1122		-0.2145	-2.1122		-0.7959	-2.1122		-1.4919	-2.1122		437.5	0.3		437.5	-2.1122		437.5
MJB00141		河谷	River Valley(RV)	88.1715	46.5541	12	939.7	7.24	7.4	118.2	196.3	60.8	131.8	348.8	109.8	8.12	0.5	-0.2868	-0.0489	-1.3127	-0.866	-6.1666	-6.4086		-6.1666	-1.3127		-6.4086	-1.3127		0.5	-1.3127		-0.0489	-1.3127		-0.2868	-1.3127		-0.866	-1.3127		939.7	0.5		939.7	-1.3127		939.7
TJ4241				87.7821	46.6362	13	989.6	7.25	11.6	130.9	180.9	99	153.8	365.3	212.6	39.4	0.8	0.4327	0.1865	-1.0024	-0.9304	-6.1048	-6.3081		-6.1048	-1.0024		-6.3081	-1.0024		0.8	-1.0024		0.1865	-1.0024		0.4327	-1.0024		-0.9304	-1.0024		989.6	0.8		989.6	-1.0024		989.6
TJ5041				88.7223	46.3628	14	953.3	7.07	4.3	96.2	184.2	87.1	126.7	324.8	274.8	5.21	1.5	0.279	0.1416	-0.4218	-0.9492	-6.4021	-6.52		-6.4021	-0.4218		-6.52	-0.4218		1.5	-0.4218		0.1416	-0.4218		0.279	-0.4218		-0.9492	-0.4218		953.3	1.5		953.3	-0.4218		953.3
MJB01241				88.5004	46.5505	15	425.4	6.69	11.1	40.7	60.1	21.9	28.4	99.9	244.1	6.54	1.8	-1.4015	-0.6425	-0.548	-1.6897	-7.4507	-7.4966		-7.4507	-0.548		-7.4966	-0.548		1.8	-0.548		-0.6425	-0.548		-1.4015	-0.548		-1.6897	-0.548		425.4	1.8		425.4	-0.548		425.4
MJB03512				88.4114	46.5431	16	923.4	7.45	4.9	114.7	132.3	36.4	120.5	336.2	292.9	18.42	0.6	0.5947	0.418	-1.3012	-1.0062	-6.1542	-6.4564		-6.1542	-1.3012		-6.4564	-1.3012		0.6	-1.3012		0.418	-1.3012		0.5947	-1.3012		-1.0062	-1.3012		923.4	0.6		923.4	-1.3012		923.4
ZK05（下层）	R8附近			88.3282	46.5557	17	552.3	7.64	2.8	61.3	32.1	31.6	66.4	150.2	167.5	15.98	0.4	0.0201	-0.1472	-2.1553	-1.7971	-6.9224	-6.9526		-6.9224	-2.1553		-6.9526	-2.1553		0.4	-2.1553		-0.1472	-2.1553		0.0201	-2.1553		-1.7971	-2.1553		552.3	0.4		552.3	-2.1553		552.3
MJD12512				87.9163	46.6073	18	959.2	7.42	8.9	141.9	112.2	43.7	120.5	365	268.5	7.34	0.9	0.4591	0.2753	-1.0319	-1.0445	-5.935	-6.3643		-5.935	-1.0319		-6.3643	-1.0319		0.9	-1.0319		0.2753	-1.0319		0.4591	-1.0319		-1.0445	-1.0319		959.2	0.9		959.2	-1.0319		959.2
ZK1013				87.8786	46.6239	19	882.8	7	6.4	73.2	168.3	43.7	35.4	432.3	305.1	14	1.6	-0.1221	0.0738	-0.3678	-0.8265	-6.4565	-7.187		-6.4565	-0.3678		-7.187	-0.3678		1.6	-0.3678		0.0738	-0.3678		-0.1221	-0.3678		-0.8265	-0.3678		882.8	1.6		882.8	-0.3678		882.8
ZK1113				88.5041	46.5296	20	562.6	7.56	1.9	98	56.1	24.3	49.6	192.1	238	1.43	1	0.2376	0.1404	-1.1378	-1.4868	-6.4305	-6.8837		-6.4305	-1.1378		-6.8837	-1.1378		1	-1.1378		0.1404	-1.1378		0.2376	-1.1378		-1.4868	-1.1378		562.6	1		562.6	-1.1378		562.6
ZK1313				88.4481	46.5254	21	570.6	7.52	4	80.8	68.1	29.2	46.1	172.9	292.9	5.3	0.4	0.4964	0.271	-1.8587	-1.4647	-6.6613	-7.0019		-6.6613	-1.8587		-7.0019	-1.8587		0.4	-1.8587		0.271	-1.8587		0.4964	-1.8587		-1.4647	-1.8587		570.6	0.4		570.6	-1.8587		570.6
ZK0713				88.2437	46.5677	22	479.6	7.51	2.7	88.8	48.1	14.6	42.5	144.1	219.7	7.4	1	-0.164	0.0163	-1.165	-1.6311	-6.6055	-6.9856		-6.6055	-1.165		-6.9856	-1.165		1	-1.165		0.0163	-1.165		-0.164	-1.165		-1.6311	-1.165		479.6	1		479.6	-1.165		479.6
ZK06（上层）13				87.8455	46.5978	23	674	7.44	3.1	96.8	60.1	43.7	80.1	259.4	207.5	7.1	0.6	0.1068	-0.0368	-1.602	-1.3811	-6.3556	-6.6901		-6.3556	-1.602		-6.6901	-1.602		0.6	-1.602		-0.0368	-1.602		0.1068	-1.602		-1.3811	-1.602		674	0.6		674	-1.602		674
TJ2211				87.9379	46.5568	24	926.25	6.97	46.98	174.4	255	31.48	120	356.5	303.5	5.7	1.4	-0.1633	0.2123	-0.3056	-0.774	-5.8372	-6.2907		-5.8372	-0.3056		-6.2907	-0.3056		1.4	-0.3056		0.2123	-0.3056		-0.1633	-0.3056		-0.774	-0.3056		926.25	1.4		926.25	-0.3056		926.25
TJ4311				88.1189	46.5555	25	1616.2	7.15	4.39	360.6	167.9	16.94	183.7	736.7	291.6	6.3	1.8	-0.438	0.1231	-0.3382	-0.6819	-4.89	-5.8061		-4.89	-0.3382		-5.8061	-0.3382		1.8	-0.3382		0.1231	-0.3382		-0.438	-0.3382		-0.6819	-0.3382		1616.2	1.8		1616.2	-0.3382		1616.2
MJA17711				88.6626	46.4247	26	637.4	7.39	7.2	55.9	81.55	17.03	66.26	217.3	583.2	8.1	0.9	0.5938	0.4762	-1.1102	-1.3308	-6.9005	-7.0175		-6.9005	-1.1102		-7.0175	-1.1102		0.9	-1.1102		0.4762	-1.1102		0.5938	-1.1102		-1.3308	-1.1102		637.4	0.9		637.4	-1.1102		637.4
MJA18211				88.8088	46.3563	27	869.35	7.29	2.02	98.9	177.4	19.8	34.35	410.5	252.7	9.3	1.1	-0.0075	0.3144	-0.6366	-0.8006	-6.1926	-7.0653		-6.1926	-0.6366		-7.0653	-0.6366		1.1	-0.6366		0.3144	-0.6366		-0.0075	-0.6366		-0.8006	-0.6366		869.35	1.1		869.35	-0.6366		869.35
MJB03211				88.5659	46.4673	28	1266.75	7.41	5.75	210.5	169.8	33.02	148.5	534.1	330.5	6.1	1.3	0.5697	0.4826	-0.5793	-0.7731	-5.4744	-6.1192		-5.4744	-0.5793		-6.1192	-0.5793		1.3	-0.5793		0.4826	-0.5793		0.5697	-0.5793		-0.7731	-0.5793		1266.75	1.3		1266.75	-0.5793		1266.75
MJA17111				88.5987	46.4453	29	541.35	7.44	4.66	56.54	113.6	15.04	42.04	150.6	317.5	11.5	0.6	0.342	0.4485	-1.2673	-1.3115	-7.0379	-7.1987		-7.0379	-1.2673		-7.1987	-1.2673		0.6	-1.2673		0.4485	-1.2673		0.342	-1.2673		-1.3115	-1.2673		541.35	0.6		541.35	-1.2673		541.35
F3-DR-QSJ-1				88.2959	46.5551	30	1056.75	7.52	23.98	128.8	179.3	36.58	129.8	392.9	330.5	12.4	0.8	0.9209	0.646	-0.9454	-0.8529	-6.0214	-6.3826		-6.0214	-0.9454		-6.3826	-0.9454		0.8	-0.9454		0.646	-0.9454		0.9209	-0.9454		-0.8529	-0.9454		1056.75	0.8		1056.75	-0.9454		1056.75
F3-GA-QSJ-1（杜热以西顶山以南）				88.176	46.5743	31	488.45	7.5	4.68	89.03	61.6	16.23	57.12	152.9	213.9	11.5	0.9	-0.0742	0.0919	-1.1621	-1.5212	-6.5974	-6.8603		-6.5974	-1.1621		-6.8603	-1.1621		0.9	-1.1621		0.0919	-1.1621		-0.0742	-1.1621		-1.5212	-1.1621		488.45	0.9		488.45	-1.1621		488.45
ZK01	37和41之间	近河	Southern of Alluvial Plain(SAP)	87.6809	46.9779	32	660.2	7.5	2.9	82.3	60.1	43.7	53.2	220.9	213.6	33.23	0.5	0.2705	0.0442	-1.7517	-1.4419	-6.5638	-6.9369		-6.5638	-1.7517		-6.9369	-1.7517		0.5	-1.7517		0.0442	-1.7517		0.2705	-1.7517		-1.4419	-1.7517		660.2	0.5		660.2	-1.7517		660.2
TJ1841				87.6936	46.8424	33	885.1	7.11	5	141.7	88.2	43.7	99.3	307.4	353.9	4.34	0.6	0.0049	-0.0046	-1.4763	-1.2002	-5.9951	-6.4454		-5.9951	-1.4763		-6.4454	-1.4763		0.6	-1.4763		-0.0046	-1.4763		0.0049	-1.4763		-1.2002	-1.4763		885.1	0.6		885.1	-1.4763		885.1
MJA21141				87.5377	47.0959	34	1478.7	7.16	5.6	214.8	184.4	58.3	163.1	672.4	244.1	46.4	1.3	0.0358	0.1109	-0.5936	-0.6884	-5.399	-6.0793		-5.399	-0.5936		-6.0793	-0.5936		1.3	-0.5936		0.1109	-0.5936		0.0358	-0.5936		-0.6884	-0.5936		1478.7	1.3		1478.7	-0.5936		1478.7
MJA00741				87.6309	47.0332	35	1381.7	7.03	22.8	252.3	136.3	43.7	198.5	499.5	341.7	39.4	1.2	-0.1311	0.023	-0.7584	-0.9015	-5.357	-5.9181		-5.357	-0.7584		-5.9181	-0.7584		1.2	-0.7584		0.023	-0.7584		-0.1311	-0.7584		-0.9015	-0.7584		1381.7	1.2		1381.7	-0.7584		1381.7
MJA09041				87.6802	46.8094	36	1097.4	7	6.5	155.6	88.2	94.8	156	393.8	317.3	16.8	0.5	-0.0413	-0.1959	-1.7162	-1.1706	-5.8794	-6.2218		-5.8794	-1.7162		-6.2218	-1.7162		0.5	-1.7162		-0.1959	-1.7162		-0.0413	-1.7162		-1.1706	-1.7162		1097.4	0.5		1097.4	-1.7162		1097.4
JJD00711				87.672	46.874	37	995.45	7.38	4.14	139.8	87.92	63.89	132	382.7	286.1	21.1	0.9	0.4773	0.149	-1.1659	-1.1456	-5.9433	-6.3343		-5.9433	-1.1659		-6.3343	-1.1659		0.9	-1.1659		0.149	-1.1659		0.4773	-1.1659		-1.1456	-1.1659		995.45	0.9		995.45	-1.1659		995.45
JJC00311				87.732	46.689	38	1059.25	7.14	5.57	112.9	113.2	65.75	120.8	420	279.5	12.6	0.9	0.0871	0.003	-1.0628	-1.0111	-6.0993	-6.4671		-6.0993	-1.0628		-6.4671	-1.0628		0.9	-1.0628		0.003	-1.0628		0.0871	-1.0628		-1.0111	-1.0628		1059.25	0.9		1059.25	-1.0628		1059.25
ZK02（上层）				87.7045	46.9374	39	1087.9	7.15	3.6	134.3	144.3	58.3	85.1	441.9	317.3	39.5	1	0.2425	0.1594	-0.8742	-0.9066	-5.9431	-6.5496		-5.9431	-0.8742		-6.5496	-0.8742		1	-0.8742		0.1594	-0.8742		0.2425	-0.8742		-0.9066	-0.8742		1087.9	1		1087.9	-0.8742		1087.9
TJ2911				87.4101	47.0415	40	1120.55	7.1	7.42	156.1	191.7	29.57	151.5	483.6	200.9	37.8	0.9	-0.4365	0.0295	-0.8224	-0.7481	-5.771	-6.2359		-5.771	-0.8224		-6.2359	-0.8224		0.9	-0.8224		0.0295	-0.8224		-0.4365	-0.8224		-0.7481	-0.8224		1120.55	0.9		1120.55	-0.8224		1120.55
MJA01911				87.4822	47.0934	41	1407.45	7.07	4.47	232	206.1	40.82	175.5	593	311.1	22.1	1.4	-0.0177	0.185	-0.4565	-0.6816	-5.3786	-6.0121		-5.3786	-0.4565		-6.0121	-0.4565		1.4	-0.4565		0.185	-0.4565		-0.0177	-0.4565		-0.6816	-0.4565		1407.45	1.4		1407.45	-0.4565		1407.45
MJA00711				87.3739	47.0759	42	1522.15	7.11	11.55	284.8	162.3	44.33	222.7	629.6	333.7	13.3	1.2	0.0368	0.1428	-0.7089	-0.7606	-5.1725	-5.8221		-5.1725	-0.7089		-5.8221	-0.7089		1.2	-0.7089		0.1428	-0.7089		0.0368	-0.7089		-0.7606	-0.7089		1522.15	1.2		1522.15	-0.7089		1522.15
MJA00311				87.3558	47.1157	43	1807.75	6.93	5.31	246.9	270.1	51.65	298.4	751.1	392.1	6.3	1	0.0422	0.2226	-0.6828	-0.5296	-5.2751	-5.7693		-5.2751	-0.6828		-5.7693	-0.6828		1	-0.6828		0.2226	-0.6828		0.0422	-0.6828		-0.5296	-0.6828		1807.75	1		1807.75	-0.6828		1807.75
MJA00411				87.3927	47.1234	44	1912	6.92	22.58	337.8	186.6	77.88	250.7	683.2	738.8	5.8	0.9	0.5711	0.3164	-0.9698	-0.7403	-5.0556	-5.714		-5.0556	-0.9698		-5.714	-0.9698		0.9	-0.9698		0.3164	-0.9698		0.5711	-0.9698		-0.7403	-0.9698		1912	0.9		1912	-0.9698		1912
F3-WLGH-SD（两湖连接）				87.3313	47.0885	45	1725.55	8.14	34.84	465.2	56.35	53.59	325.8	592.8	392.9	3.4	1.8	1.8137	0.7581	-0.8434	-1.2445	-4.7686	-5.4475		-4.7686	-0.8434		-5.4475	-0.8434		1.8	-0.8434		0.7581	-0.8434		1.8137	-0.8434		-1.2445	-0.8434		1725.55	1.8		1725.55	-0.8434		1725.55
MJA22441		远河	Nouthern of Alluvial Plain(NAP)	87.5742	47.1286	46	2050.4	7.2	8.8	244.4	260.5	94.8	124.1	1095.1	341.7	31.9	1	0.6179	0.3729	-0.7701	-0.4384	-5.1533	-6.1635		-5.1533	-0.7701		-6.1635	-0.7701		1	-0.7701		0.3729	-0.7701		0.6179	-0.7701		-0.4384	-0.7701		2050.4	1		2050.4	-0.7701		2050.4
TJ1241				87.873	46.9313	47	3315.9	7.23	6.9	368.1	601.2	24.3	170.2	1969.2	292.9	3.5	1.8	0.1079	0.5976	0.0434	0.0369	-4.6382	-5.8824		-4.6382	0.0434		-5.8824	0.0434		1.8	0.0434		0.5976	0.0434		0.1079	0.0434		0.0369	0.0434		3315.9	1.8		3315.9	0.0434		3315.9
TJ2141				87.9323	46.8116	48	1974.3	7.2	6.2	420.1	84.2	133.6	460.8	489.9	695.6	5	1	1.011	0.244	-1.2508	-1.22	-5.0278	-5.3539		-5.0278	-1.2508		-5.3539	-1.2508		1	-1.2508		0.244	-1.2508		1.011	-1.2508		-1.22	-1.2508		1974.3	1		1974.3	-1.2508		1974.3
MJA06041				87.7073	47.0118	49	1960.9	7.08	19	371.1	208.4	55.9	354.5	720.4	292.9	64.8	1	0.0121	0.1336	-0.804	-0.6558	-4.9414	-5.5203		-4.9414	-0.804		-5.5203	-0.804		1	-0.804		0.1336	-0.804		0.0121	-0.804		-0.6558	-0.804		1960.9	1		1960.9	-0.804		1960.9
MJC10241				87.4161	47.0936	50	1496.2	7.22	8.8	253.3	120.2	82.6	177.2	662.8	341.7	1.2	1	0.4121	0.1303	-1.0279	-0.8767	-5.2607	-5.9707		-5.2607	-1.0279		-5.9707	-1.0279		1	-1.0279		0.1303	-1.0279		0.4121	-1.0279		-0.8767	-1.0279		1496.2	1		1496.2	-1.0279		1496.2
ZK08（上层）				88.0238	46.6992	51	3212.5	7.6	2.2	828.5	72.1	177.4	907.5	1066.3	238	16.2	0.7	0.7609	0.0262	-1.7396	-1.0688	-4.1891	-4.7931		-4.1891	-1.7396		-4.7931	-1.7396		0.7	-1.7396		0.0262	-1.7396		0.7609	-1.7396		-1.0688	-1.7396		3212.5	0.7		3212.5	-1.7396		3212.5
ZK05（上层）				87.4973	47.129	52	974.7	7.49	4.5	187.9	64.1	53.5	124.1	365	305.1	1.9	1	0.5509	0.1558	-1.1965	-1.2802	-5.6851	-6.2296		-5.6851	-1.1965		-6.2296	-1.1965		1	-1.1965		0.1558	-1.1965		0.5509	-1.1965		-1.2802	-1.1965		974.7	1		974.7	-1.1965		974.7
TJ0611				87.6018	47.1734	53	3098.45	6.88	8.41	388	540.5	61.98	190.6	1753	311.1	28.3	2.1	-0.1367	0.2478	0.1269	-0.0471	-4.6442	-5.8066		-4.6442	0.1269		-5.8066	0.1269		2.1	0.1269		0.2478	0.1269		-0.1367	0.1269		-0.0471	0.1269		3098.45	2.1		3098.45	0.1269		3098.45
TJ1011				87.6812	47.112	54	4156.65	7.21	16.41	553.9	609.9	131.7	277.8	2313	508.7	36.9	2.6	1.2038	0.7805	0.2617	0.0299	-4.2948	-5.5113		-4.2948	0.2617		-5.5113	0.2617		2.6	0.2617		0.7805	0.2617		1.2038	0.2617		0.0299	0.2617		4156.65	2.6		4156.65	0.2617		4156.65
MJA16211	52下边53下边			87.7171	47.0653	55	3273.7	7.14	1.09	628.6	328	115	799.4	1343	116.6	6.2	2.1	-0.347	-0.1026	-0.0995	-0.3451	-4.3411	-4.9718		-4.3411	-0.0995		-4.9718	-0.0995		2.1	-0.0995		-0.1026	-0.0995		-0.347	-0.0995		-0.3451	-0.0995		3273.7	2.1		3273.7	-0.0995		3273.7
TJ1111				87.7966	47.0772	56	5621.8	7.22	11.84	1153	534.6	117	589	3038	356.4	26.3	2.3	0.696	0.5246	0.0364	0.0278	-3.5881	-4.8889		-3.5881	0.0364		-4.8889	0.0364		2.3	0.0364		0.5246	0.0364		0.696	0.0364		0.0278	0.0364		5621.8	2.3		5621.8	0.0364		5621.8
TJ1511				87.7862	46.7518	57	2201.55	7.41	4.93	651.2	81.13	31.62	422.4	909.5	200.9	21.3	1.4	-0.3706	-0.1365	-0.9386	-0.9573	-4.3283	-5.205		-4.3283	-0.9386		-5.205	-0.9386		1.4	-0.9386		-0.1365	-0.9386		-0.3706	-0.9386		-0.9573	-0.9386		2201.55	1.4		2201.55	-0.9386		2201.55
TJ1611				87.8941	46.7506	58	565.85	7.31	2.33	89.43	89.54	11.63	56.49	193.3	246.3	13.4	1.3	-0.3597	0.1034	-0.6996	-1.2943	-6.5157	-6.8705		-6.5157	-0.6996		-6.8705	-0.6996		1.3	-0.6996		0.1034	-0.6996		-0.3597	-0.6996		-1.2943	-0.6996		565.85	1.3		565.85	-0.6996		565.85
ZK1213	55，59前面			87.8465	46.7855	59	638.7	7.84	1.9	78.3	82.1	29.9	33.2	286.2	229.2	14.34	1.4	0.9366	0.5286	-0.7231	-1.2059	-6.4883	-7.1648		-6.4883	-0.7231		-7.1648	-0.7231		1.4	-0.7231		0.5286	-0.7231		0.9366	-0.7231		-1.2059	-0.7231		638.7	1.4		638.7	-0.7231		638.7
MJD08511				87.8725	46.8397	60	1490.25	7.4	3.61	301.9	149.6	28.07	142.7	692.6	343.5	5.2	1.4	0.3889	0.4014	-0.6041	-0.7456	-5.0606	-5.9887		-5.0606	-0.6041		-5.9887	-0.6041		1.4	-0.6041		0.4014	-0.6041		0.3889	-0.6041		-0.7456	-0.6041		1490.25	1.4		1490.25	-0.6041		1490.25
MJA15811	56上边一些			87.9516	46.8955	61	2653.5	7.1	7.88	579.9	295.5	30.85	710.4	941.4	175	12.8	1.6	-0.5876	0.0392	-0.2749	-0.4533	-4.4891	-5.0421		-4.4891	-0.2749		-5.0421	-0.2749		1.6	-0.2749		0.0392	-0.2749		-0.5876	-0.2749		-0.4533	-0.2749		2653.5	1.6		2653.5	-0.2749		2653.5
MJA14741	53与57上边			87.8679	47.0684	62	5413.4	7.13	2.2	639.7	801.7	243	443.1	3073.9	390.5	1.7	2.2	1.1004	0.6552	0.1372	0.177	-4.1322	-5.2646		-4.1322	0.1372		-5.2646	0.1372		2.2	0.1372		0.6552	0.1372		1.1004	0.1372		0.177	0.1372		5413.4	2.2		5413.4	0.1372		5413.4
MJD01811				87.8129	47.0237	63	1809.45	7.24	34.25	121.6	396.6	45.01	114.5	942.5	311.1	19.2	1.7	0.5222	0.5773	-0.063	-0.3029	-5.8136	-6.4956		-5.8136	-0.063		-6.4956	-0.063		1.7	-0.063		0.5773	-0.063		0.5222	-0.063		-0.3029	-0.063		1809.45	1.7		1809.45	-0.063		1809.45
MJD03011				87.7826	46.8416	64	1680.35	7.23	3.06	198.2	332.1	19.39	86.32	823.2	395.3	17.3	1.6	0.3002	0.6104	-0.1597	-0.3968	-5.4103	-6.4006		-5.4103	-0.1597		-6.4006	-0.1597		1.6	-0.1597		0.6104	-0.1597		0.3002	-0.1597		-0.3968	-0.1597		1680.35	1.6		1680.35	-0.1597		1680.35
公安（qsi-4）ga-2				87.8424	46.7345	65	681.55	7.38	4.73	78.1	151.5	20.71	71.13	222.6	265.7	16.8	1.4	0.2642	0.4037	-0.4476	-1.0781	-6.6355	-6.8412		-6.6355	-0.4476		-6.8412	-0.4476		1.4	-0.4476		0.4037	-0.4476		0.2642	-0.4476		-1.0781	-0.4476		681.55	1.4		681.55	-0.4476		681.55
YH1				87.6279	47.2078	66	4228	7.12	15.1	909.8	364.1	128.8	1028	1527.4	356.3	27.9	2.3	0.5958	0.3657	-0.0317	-0.3103	-4.0235	-4.7212		-4.0235	-0.0317		-4.7212	-0.0317		2.3	-0.0317		0.3657	-0.0317		0.5958	-0.0317		-0.3103	-0.0317		4228	2.3		4228	-0.0317		4228
YH2				87.6917	47.1709	67	3815.8	7.23	11.3	1096.9	376.2	182.6	886.2	1085.5	319.7	33.5	2.5	0.952	0.4718	0.049	-0.4406	-4.0371	-4.7005		-4.0371	0.049		-4.7005	0.049		2.5	0.049		0.4718	0.049		0.952	0.049		-0.4406	0.049		3815.8	2.5		3815.8	0.049		3815.8
YH3				87.7509	47.1354	68	3488.15	7.22	9.08	628.3	252.2	79.37	980.1	1273	371.7	30.4	2.2	0.5332	0.3607	-0.1618	-0.4657	-4.3431	-4.8865		-4.3431	-0.1618		-4.8865	-0.1618		2.2	-0.1618		0.3607	-0.1618		0.5332	-0.1618		-0.4657	-0.1618		3488.15	2.2		3488.15	-0.1618		3488.15
MJA18341	56 46 58 与45之间			87.7824	46.9824	69	2117.6	7.3	4.9	531.4	44.1	97.2	354.5	874.1	268.5	15.3	1.2	-0.0975	-0.3767	-1.3713	-1.2466	-4.5375	-5.3656		-4.5375	-1.3713		-5.3656	-1.3713		1.2	-1.3713		-0.3767	-1.3713		-0.0975	-1.3713		-1.2466	-1.3713		2117.6	1.2		2117.6	-1.3713		2117.6
QSA00641				87.8603	46.8856	70	1954.2	7.4	14.2	491.3	160.3	24.3	460.8	576.4	414.9	3.7	1.5	0.5098	0.5055	-0.5283	-0.8251	-4.7612	-5.2807		-4.7612	-0.5283		-5.2807	-0.5283		1.5	-0.5283		0.5055	-0.5283		0.5098	-0.5283		-0.8251	-0.5283		1954.2	1.5		1954.2	-0.5283		1954.2
MJA13711				87.797	46.9112	71	1989.15	7.12	1.29	431.2	193.6	39.37	321.7	869.5	265.7	8.1	1.1	-0.2102	0.0845	-0.7558	-0.6071	-4.7157	-5.4977		-4.7157	-0.7558		-5.4977	-0.7558		1.1	-0.7558		0.0845	-0.7558		-0.2102	-0.7558		-0.6071	-0.7558		1989.15	1.1		1989.15	-0.7558		1989.15
MJA15941	41和45之间			87.8295	46.9564	72	1821.5	7.67	3.6	430.9	100.2	60.8	354.5	634	390.5	17.9	2.5	1.1799	0.5402	-0.3174	-0.9871	-4.83	-5.4484		-4.83	-0.3174		-5.4484	-0.3174		2.5	-0.3174		0.5402	-0.3174		1.1799	-0.3174		-0.9871	-0.3174		1821.5	2.5		1821.5	-0.3174		1821.5
TJ3441				87.538	47.1955	73	4320.2	7.08	12.3	627.8	561.1	121.5	312	2401.5	506.5	10.5	2.9	0.8573	0.6073	0.3171	0.0109	-4.1646	-5.408		-4.1646	0.3171		-5.408	0.3171		2.9	0.3171		0.6073	0.3171		0.8573	0.3171		0.0109	0.3171		4320.2	2.9		4320.2	0.3171		4320.2
ZK03				87.6393	47.1422	74	4017	7.82	7	1109.8	64.1	128.8	1028	1527.4	256.3	68.8	0.9	0.9489	0.166	-1.6052	-1.0198	-3.8034	-4.6308		-3.8034	-1.6052		-4.6308	-1.6052		0.9	-1.6052		0.166	-1.6052		0.9489	-1.6052		-1.0198	-1.6052		4017	0.9		4017	-1.6052		4017
MJA00211				87.492	47.1563	75	2319.6	6.92	19.73	346.1	296.7	69.22	356.1	1021	453.6	7.1	1.5	0.2168	0.2678	-0.3554	-0.425	-4.899	-5.5621		-4.899	-0.3554		-5.5621	-0.3554		1.5	-0.3554		0.2678	-0.3554		0.2168	-0.3554		-0.425	-0.3554		2319.6	1.5		2319.6	-0.3554		2319.6
MJA00511				87.3587	47.1588	76	4988.65	6.94	8.43	828.2	573.4	169.8	917.5	2148	764.7	4.2	1.9	1.0905	0.6526	-0.0765	-0.0592	-4.0232	-4.8301		-4.0232	-0.0765		-4.8301	-0.0765		1.9	-0.0765		0.6526	-0.0765		1.0905	-0.0765		-0.0592	-0.0765		4988.65	1.9		4988.65	-0.0765		4988.65
MJA00611				87.3989	47.1938	77	4988.65	7.05	25.93	376.1	200.9	51.58	256.5	967.4	511.9	5.7	2.1	0.3031	0.2909	-0.2113	-0.5764	-4.8073	-5.6622		-4.8073	-0.2113		-5.6622	-0.2113		2.1	-0.2113		0.2909	-0.2113		0.3031	-0.2113		-0.5764	-0.2113		4988.65	2.1		4988.65	-0.2113		4988.65
TJ0711				87.4564	47.2251	78	7511.25	7.16	25.66	1716	560.4	157.6	1083	3729	479.5	7.6	1.9	0.8888	0.5656	-0.1861	0.056	-3.2311	-4.475		-3.2311	-0.1861		-4.475	-0.1861		1.9	-0.1861		0.5656	-0.1861		0.8888	-0.1861		0.056	-0.1861		7511.25	1.9		7511.25	-0.1861		7511.25
TJ0911				87.5818	47.2386	79	8553.31	6.82	40.76	2866	624.1	163.6	1078	3598	365.7	8.3	2.1	0.0451	0.1561	-0.0693	0.0502	-2.8622	-4.2635		-2.8622	-0.0693		-4.2635	-0.0693		2.1	-0.0693		0.1561	-0.0693		0.0451	-0.0693		0.0502	-0.0693		8553.31	2.1		8553.31	-0.0693		8553.31
[truncated: 11 more columns]

## Sheet: Variations in TDS between river
		Serial Number	distance		TDS	Cl	Serial Number	distance		TDS	Cl	Serial Number	distance		TDS	Cl	Serial Number	distance		TDS	Cl			flow rate m3/d*10^3
		TJ5411	5	10	515.3		MJA18211	15	20	939.7		JJC00311	38	43	1381.7		R1	1	6	37.9		3.5	8.5	2906.85	flow-rate measurement
		ZK1514	7	12	581.1		TJ5041	16	21	937.4		MJA09041	39	44	885.1		R2	2	7	178.1		3.7	8.7	2894.52		A	二台	3.5	2.90685e+06	2906.85
		MJA19641	8	13	769.3		MJA17711	17	22	1616.2		TJ1841	40	45	959.25		R3	3	8	240.9		16.5	21.5	2394.66		B	节点1	3.7	2.79452e+06	2794.52
		MJA16711	9	14	776.85		MJA17111	18	23	959.2		JJD00711	41	46	1087.9		R4	4	9	206.2		18.3	23.3	2064.66		C	节点2(温都和喀拉布勒跟中间	16.5	2.39466e+06	2394.66
		MJA18811	10	15	568		MJB03211	19	24	926.25		ZK02（上层）	43	48	1478.7		R5	6	11	484.3		23.8	28.8	1932.05		1	福海与富蕴分界处测流点（提升到杜热和喀拉布勒跟之间）	18.3	2.06466e+06	2064.66
		MJA19911	11	16	793.3		ZK1113	21	26	425.4		MJA00741	44	49	925.45		R6	13	18	311.7		24.3	29.3	475.82		D	节点3	23.8	1.93205e+06	1932.05
		TJ5141	12	17	494.1		MJB01241	22	27	541.35		MJA21141	46	51	1097.4		R7	20	25	302.1		28.5	33.5	353.463		2	顶山测流点	24.3	475820	475.82	water diversion volume 160
		MJA18511	14	19	776.8		ZK1313	23	28	570.6		MJA01911	47	52	1120.55		R8	25	30	377.3		29.1	34.1	83.6888		3--1	哈拉霍英水库测流点	28.5	353463	353.463	diversion discharge 3*10^4 m3
							MJB03512	24	29	1266.75		TJ2911	48	53	1407.45		R9	31	36	405.8		38.9	43.9	66.9673		3--2	喀镇分流测流点	29.1	83688.8	83.6888
							F3-DR-QSJ-1	26	31	882.8							R10	37	42	532.2		42.4	47.4	128.321		4	喀齐段测流点	38.9	66967.3	66.9673
							ZK0713	27	32	945.2							R11	42	47	600.1		44.5	49.5	176.672		5	齐干吉迭乡测流点	42.4	128321	128.321
							F3-GA-QSJ-1（杜热以西顶山以南）	28	33	989.6							R12	45	50	683.8		45.3	50.3	183.501		6	阔克阿尕什乡测流点	44.5	176672	176.672
							MJB00141	29	34	869.35							J	49	54	1102.6		45.7	50.7	158.904		7	福海水文站测流点	45.3	183501	183.501
							TJ4311	30	35	488.45												47.3	52.3	77.0597		E	福海	45.7	158904	158.904
							TJ2211	32	37	479.6												48.2	53.2	273.693		8	阔尼克买村测流点	47.3	77059.7	77.0597
							MJD12512	33	38	562.6																9	吉力湖入湖口测流点	48.2	273693	273.693
							ZK1013	34	39	923.4																	Flow-measurement site area (Chinese place name)
							ZK06（上层）13	35	40	1056.75
							TJ4241	36	41	943.3

## Sheet: SalClass_SimpClHCO3Cl
Serial Number	Cl（meq/L	HCO3（meq/L	Cl-（meq/L	Salinization classification using Simpson’s derivative: Cl vs. HCO₃ vs. Cl	HCO3-/Cl-	Cl（meq/L	HCO3/Cl	Cl（meq/L	HCO3/Cl	Cl（meq/L	HCO3/Cl	Cl（meq/L	HCO3/Cl	Cl（meq/L	HCO3/Cl	Cl（meq/L	HCO3/Cl	Cl（meq/L	HCO3/Cl	Cl（meq/L	HCO3/Cl
	35.5	61	LM		LM	HR	HR	RV	RV	SAP	SAP	NAP	NAP	LP	LP	UL	UL	JL	JL	R	R
TJ5141	0.997183	4.20164	0.997183		4.21351	12.4817	0.512882	3.71268	0.484825	2.79718	2.0741	3.49577	1.6024	6.27324	0.872036	12.2113	0.552567	6.34366	0.717122	0.0732394	5.79729
MJA19641	0.8	6.40164	0.8		8.00205	9.98592	0.641067	4.33239	0.804462	4.59437	0.870988	4.79437	1.00152	8.78873	0.944764	11.9746	0.601955	4.38592	0.90902	0.233803	2.83333
ZK1514	1.39718	5.80164	1.39718		4.15238	9.98592	0.440785	3.56901	1.26223	5.59155	1.0018	12.9803	0.878508	28.9577	0.145096	12.0254	0.522803	4.89577	0.793592	0.357746	5.93882
TJ5411	2.15183	5.20492	2.15183		2.41883	12.9803	0.523998	0.8	5.00205	4.39437	1.18371	9.98592	0.480841	10.031	0.74131	11.9521	0.556044	4.89296	0.868428	0.295775	4.3121
MJA16711	2.86761	5.52459	2.86761		1.92655	9.06197	0.480661	3.39437	1.41459	3.71831	1.26137	4.99155	1.12222	8.40563	0.76471	11.4704	0.400667	5.69296	0.738042	0.847887	3.00651
MJA18511	3.17746	2.97377	3.17746		0.935894	20.0113	0.143362	3.39437	1.29675	3.40282	1.34652	25.5634	0.152626	7.06197	1.71503	10.9634	0.668545	6.17746	0.765341	0.515493	5.35855
MJA18811	1.34873	3.4	1.34873		2.52089	22.5183	0.0848854	0.997183	5.01577	2.39718	2.1699	3.49577	1.43077	25.8451	0.485047					0.743662	3.28459
MJA19911	0.84507	5.74098	0.84507		6.7935			1.39718	2.7925	4.26761	0.771731	5.36901	0.949895	7.22535	1.16144					1.02254	2.59721
MJA14741	12.4817	6.40164						1.29859	3.69757	4.94366	1.03162	7.82535	1.06568	30.507	0.257667					1.15211	2.49008
MJA15941	9.98592	6.40164						1.19718	3.00843			16.5915	0.352145	30.3662	0.197426					1.36338	2.33749
MJA18341	9.98592	4.40164						2.25634	1.50759			11.8986	0.276793	9.17746	0.701826					1.55775	2.25104
QSA00641	12.9803	6.80164						3.38028	1.47189			1.59127	2.53741							1.78028	1.9057
MJA13711	9.06197	4.35574						5.17465	0.923798			4.01972	1.40088
MJA15811	20.0113	2.86885						1.86648	5.1223			3.22535	1.58122
MJA16211	22.5183	1.91148						0.967606	4.28131			2.43155	2.6651
MJB00141	3.71268	1.8						4.1831	1.29522			2.00366	2.17389
TJ4241	4.33239	3.48525						1.18423	4.39521			28.9577	0.201707
TJ5041	3.56901	4.50492						3.65634	1.48182			24.9634	0.209947
MJB01241	0.8	4.00164						1.60901	2.17932			27.6085	0.220709
MJB03512	3.39437	4.80164
MJD12512	3.39437	4.40164
ZK1013	0.997183	5.00164
ZK1113	1.39718	3.90164
ZK1313	1.29859	4.80164
ZK0713	1.19718	3.60164
ZK06（上层）13	2.25634	3.40164
TJ2211	3.38028	4.97541
TJ4311	5.17465	4.78033
MJA17711	1.86648	9.56066
MJA18211	0.967606	4.14262
MJB03211	4.1831	5.41803
MJA17111	1.18423	5.20492
F3-DR-QSJ-1	3.65634	5.41803
F3-GA-QSJ-1（杜热以西顶山以南）	1.60901	3.50656
TJ1841	2.79718	5.80164
MJA21141	4.59437	4.00164
MJA00741	5.59155	5.60164
MJA09041	4.39437	5.20164
JJD00711	3.71831	4.69016
JJC00311	3.40282	4.58197
ZK02（上层）	2.39718	5.20164
TJ2911	4.26761	3.29344
MJA01911	4.94366	5.1
MJA22441	3.49577	5.60164
TJ1241	4.79437	4.80164
TJ2141	12.9803	11.4033
MJA06041	9.98592	4.80164
MJC10241	4.99155	5.60164
ZK08（上层）	25.5634	3.90164
ZK05（上层）	3.49577	5.00164
TJ0611	5.36901	5.1
TJ1011	7.82535	8.33934
TJ1111	16.5915	5.84262
TJ1511	11.8986	3.29344
TJ1611	1.59127	4.0377
MJD08511	4.01972	5.63115
MJD01811	3.22535	5.1
MJD03011	2.43155	6.48033
公安（qsi-4）ga-2	2.00366	4.35574
YH1	28.9577	5.84098
YH2	24.9634	5.24098
YH3	27.6085	6.09344
MJA00711	6.27324	5.47049
TJ3441	8.78873	8.30328
ZK03	28.9577	4.20164
MJA00211	10.031	7.43607
MJA00311	8.40563	6.42787
MJA00411	7.06197	12.1115
MJA00511	25.8451	12.5361
MJA00611	7.22535	8.3918
TJ0711	30.507	7.86066
TJ0911	30.3662	5.99508
F3-WLGH-SD（两湖连接）	9.17746	6.44098
F3-SLA-WLGH-1	12.2113	6.74754
F3-SLA-WLGH-2	11.9746	7.2082
F3-SLA-WLGH-3	12.0254	6.28689
F3-SLA-WLGH-4	11.9521	6.6459
F3-SLA-WLGH-5	11.4704	6.40164
F3-SLA-WLGH-6	10.9634	7.32951
F3-SLA-JLH-1	6.34366	4.54918
F3-SLA-JLH-2	4.38592	3.98689
F3-SLA-JLH-3	4.89577	3.88525
F3-SLA-JLH-4	4.89296	4.24918
F3-SLA-JLH-5	5.69296	4.20164
F3-SLA-JLH-6	6.17746	4.72787
R1	0.0732394	0.42459
R2	0.233803	1.86393
R3	0.357746	2.12459
R4	0.295775	1.27541
R5	0.847887	2.54918
R6	0.515493	2.7623
R7	0.743662	2.44262
R8	1.02254	2.65574
R9	1.15211	2.86885
R10	1.36338	3.18689
R11	1.55775	3.50656
R12	1.78028	3.27377
ZK01锛堜笂灞傦級13	1.49859	3.50164	1.49859
MJC06011	0.493521	1.91148	0.493521
ZK05（下层）	1.87042	2.7459	1.87042
ZK06（下层）13	1.31549	3.00164	1.31549
JJD00211	0.872113	3.23934	0.872113
ZK1213	0.935211	3.75738	0.935211
F3-SRE-FHSK	0.943944	2.49672	0.943944
